# Supplementary material for: Copper-induced ammonia N–H functionalization
Source: Royal Society of Chemistry journal article supplement (doi:10.1039/c5dt04972e), 2016-01-01
Supplement: c5dt04972e1.pdf [file c5dt04972e1.pdf]

*Electronic Supporting Information*

## **Copper-Induced Ammonia N-H Functionalization**

María Álvarez,<sup>§</sup> Eleuterio Álvarez,<sup>≠</sup> Manuel R. Fructos,<sup>§</sup> Juan Urbano<sup>§</sup> and Pedro J. Pérez\*

### **Table of Contents**

|                                                   |    |
|---------------------------------------------------|----|
| Spectroscopic data for compounds <b>1-7</b> ..... | 2  |
| X-Ray structure determination data.....           | 16 |

**NMR spectra of compounds.**

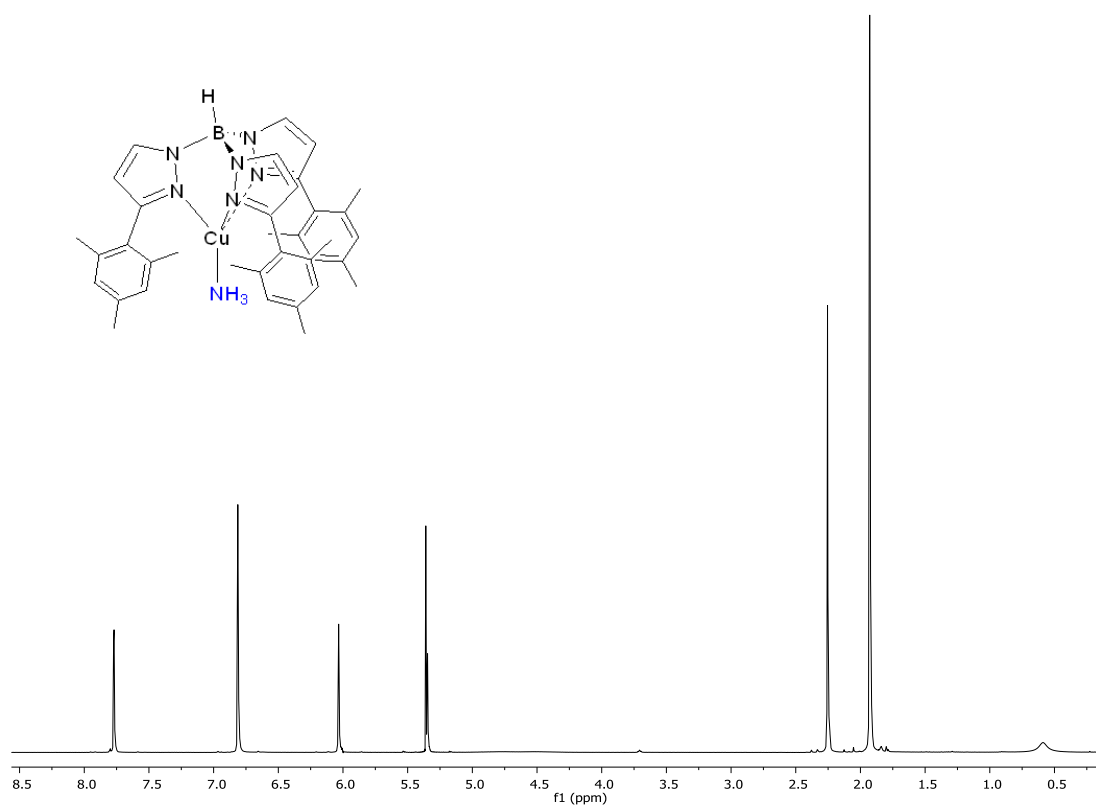

$^1\text{H}$  NMR spectrum of  $\text{Tp}^{\text{Ms}}\text{Cu}(\text{NH}_3)$  (1) ( $\text{CD}_2\text{Cl}_2$ , 500 MHz)

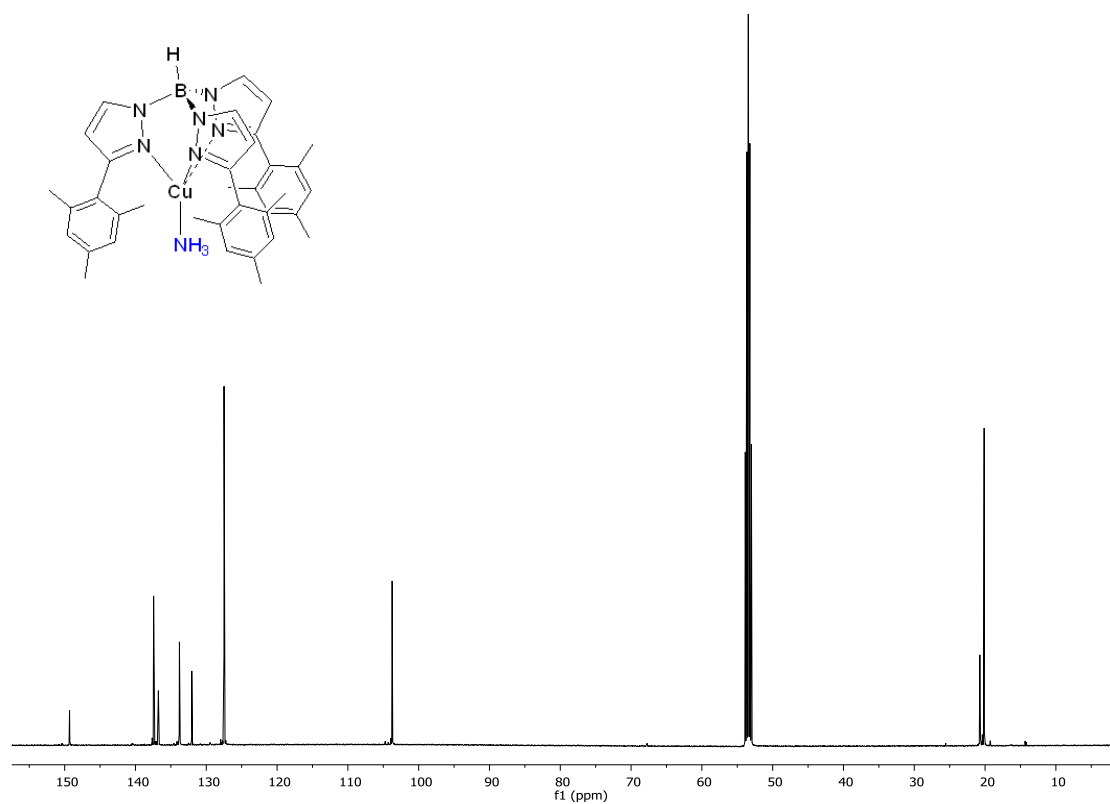

$^{13}\text{C}\{^1\text{H}\}$  NMR spectrum of  $\text{Tp}^{\text{Ms}}\text{Cu}(\text{NH}_3)$  (1) ( $\text{CD}_2\text{Cl}_2$ , 500 MHz)

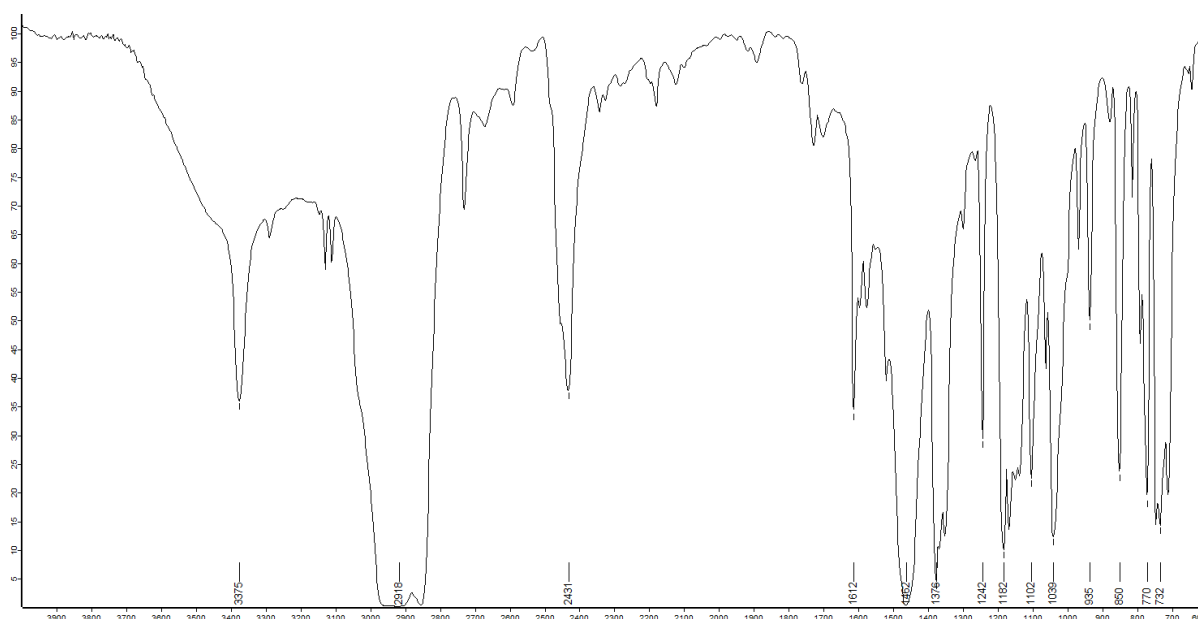

IR spectrum of  $\text{Tp}^{\text{Ms}}\text{Cu}(\text{NH}_3)$  (1)

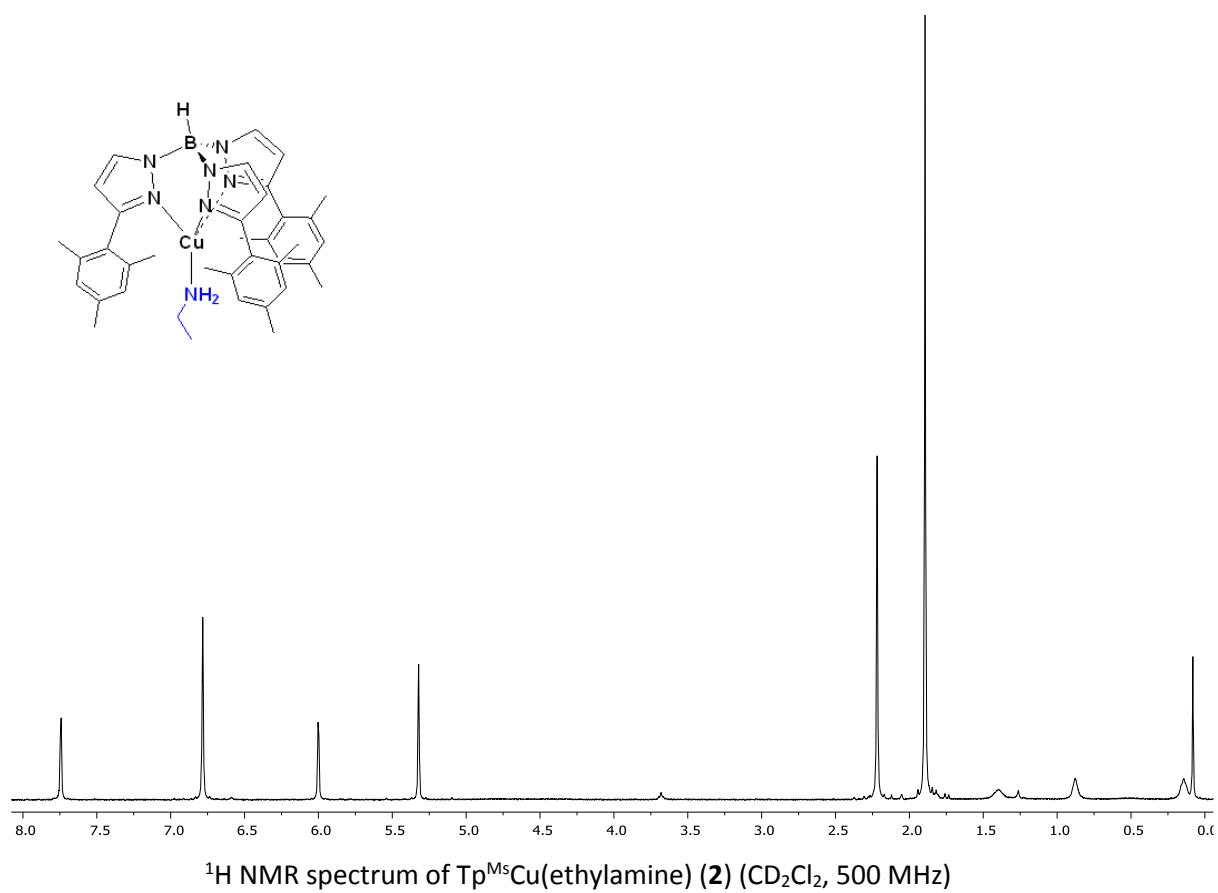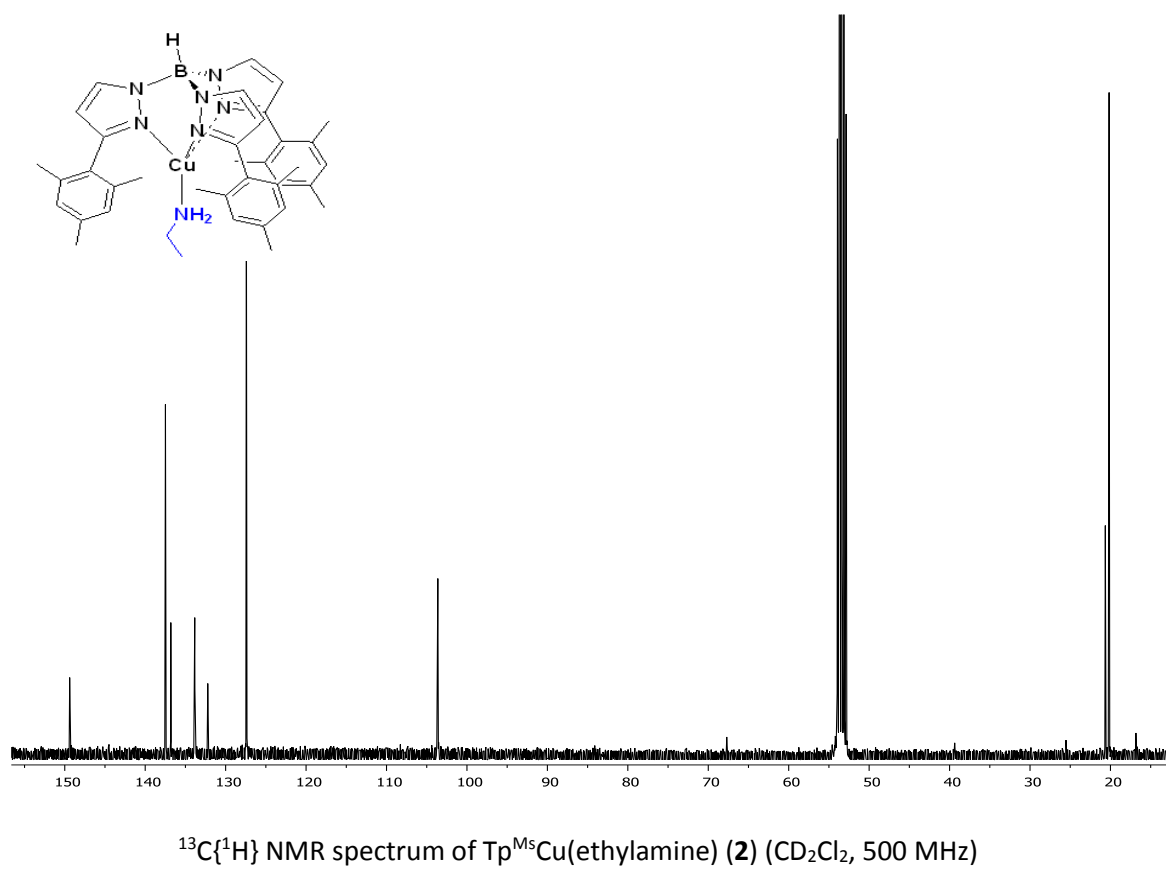

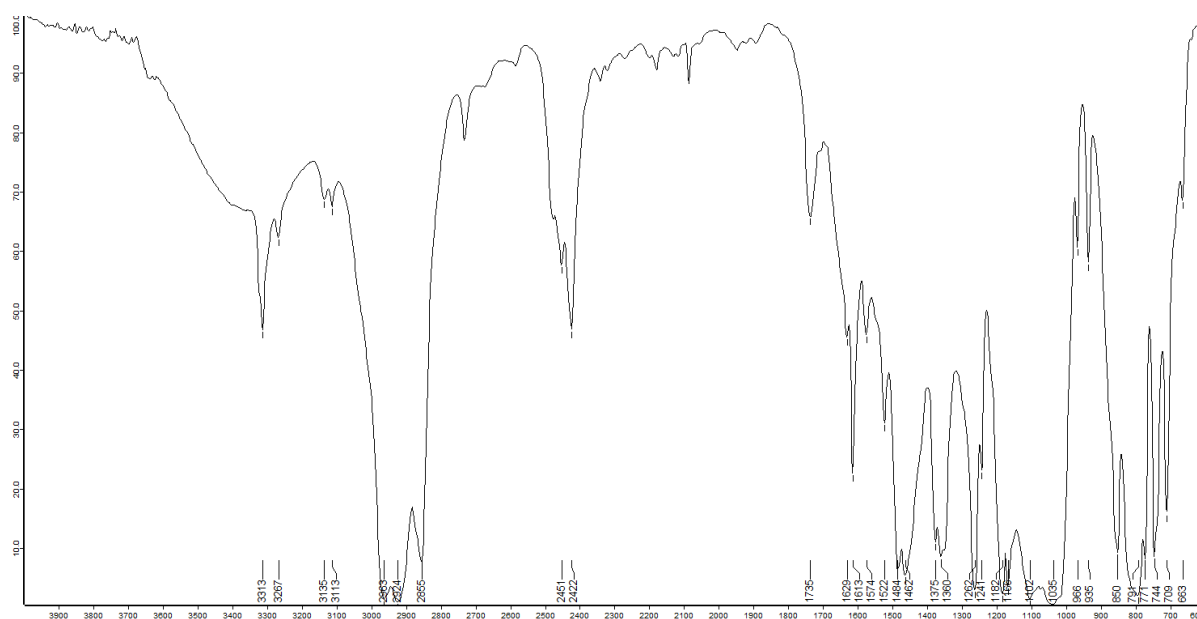

IR spectrum of  $\text{Tp}^{\text{Ms}}\text{Cu}(\text{ethylamine})$  (2)

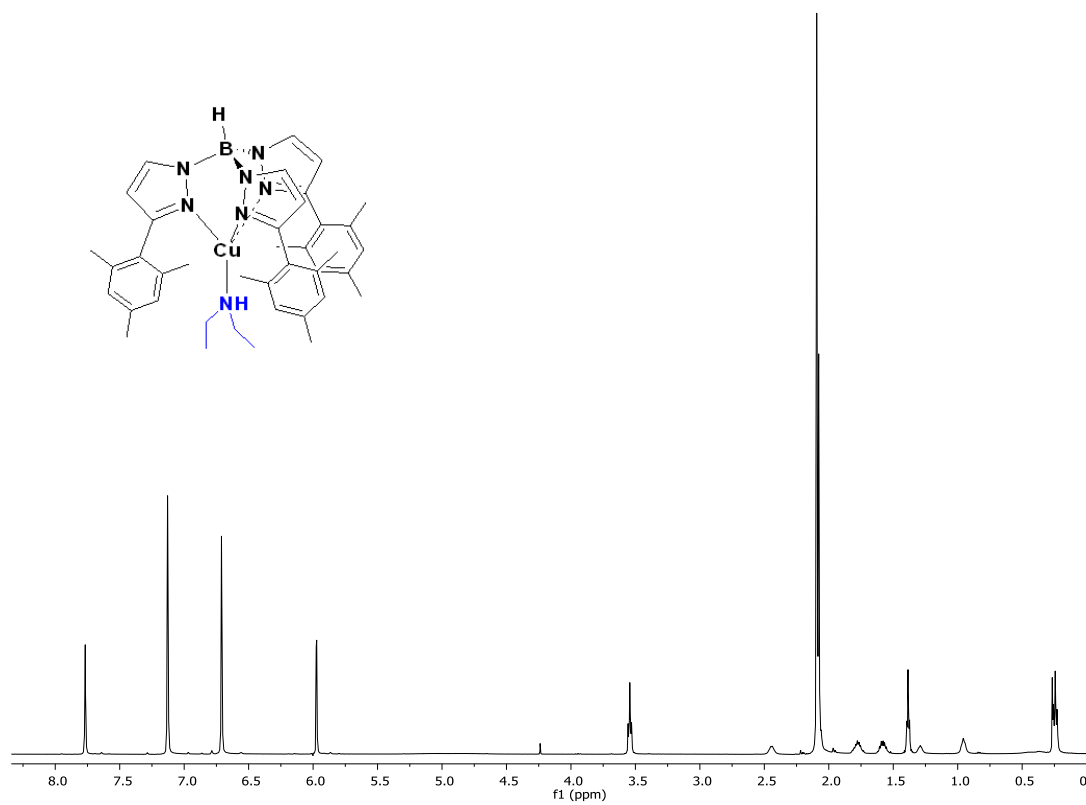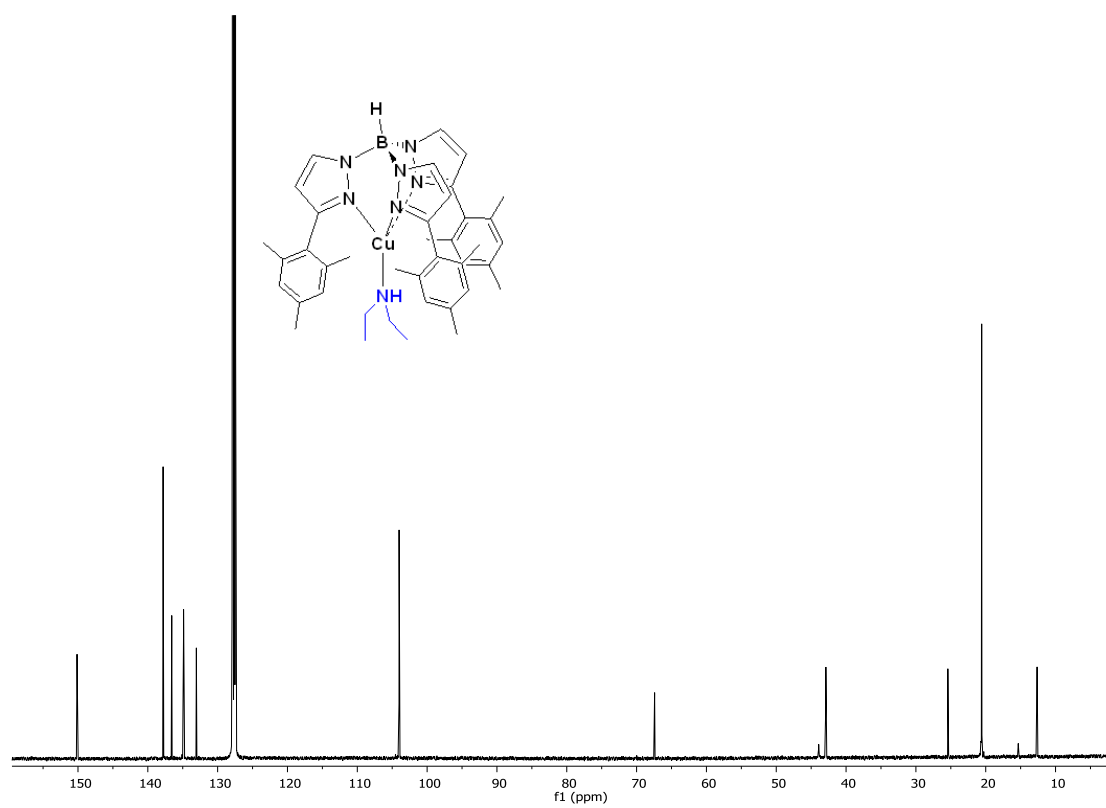

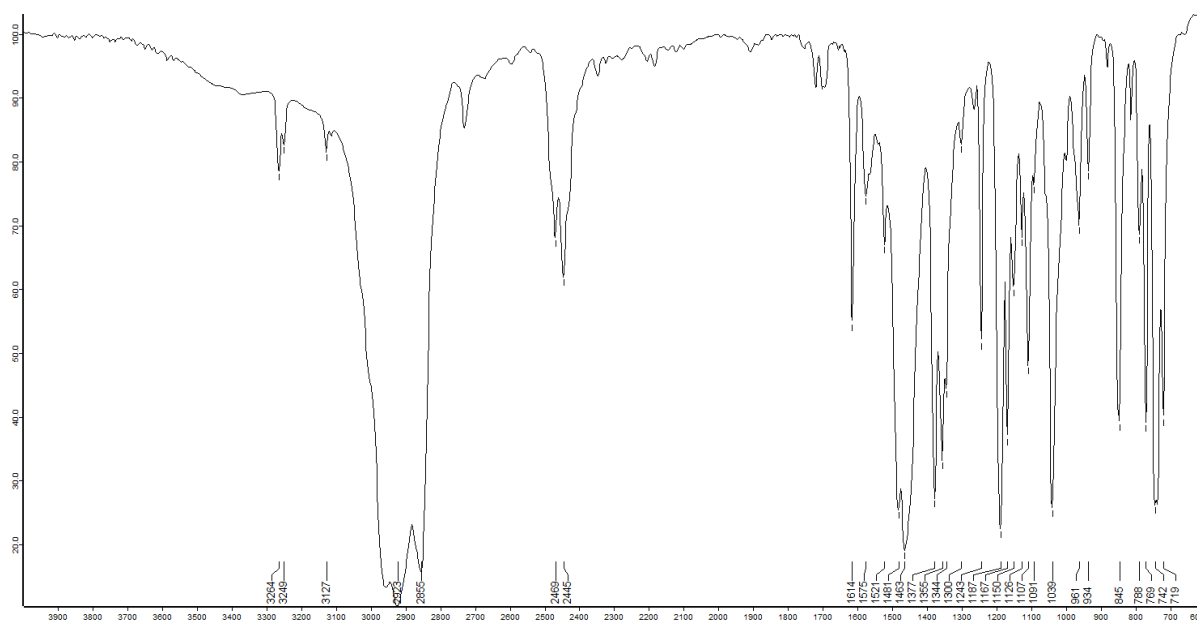

IR spectrum of  $\text{Tp}^{\text{Ms}}\text{Cu}(\text{diethylamine})$  (**3**)

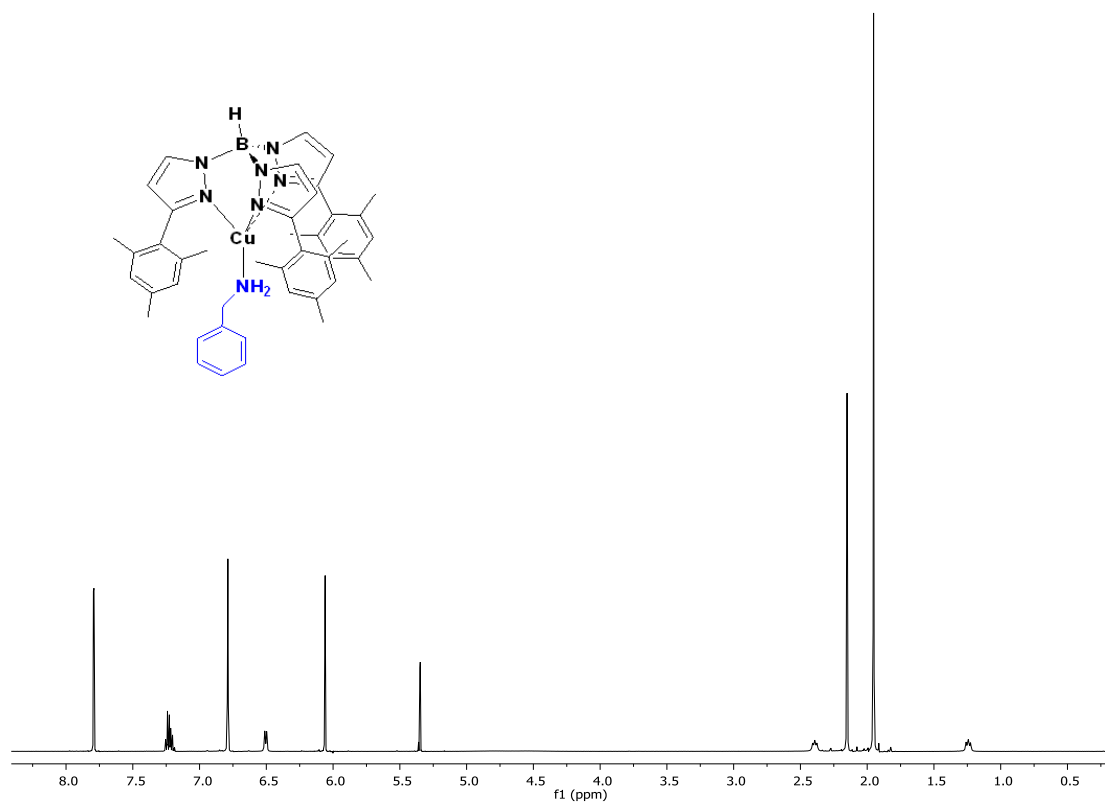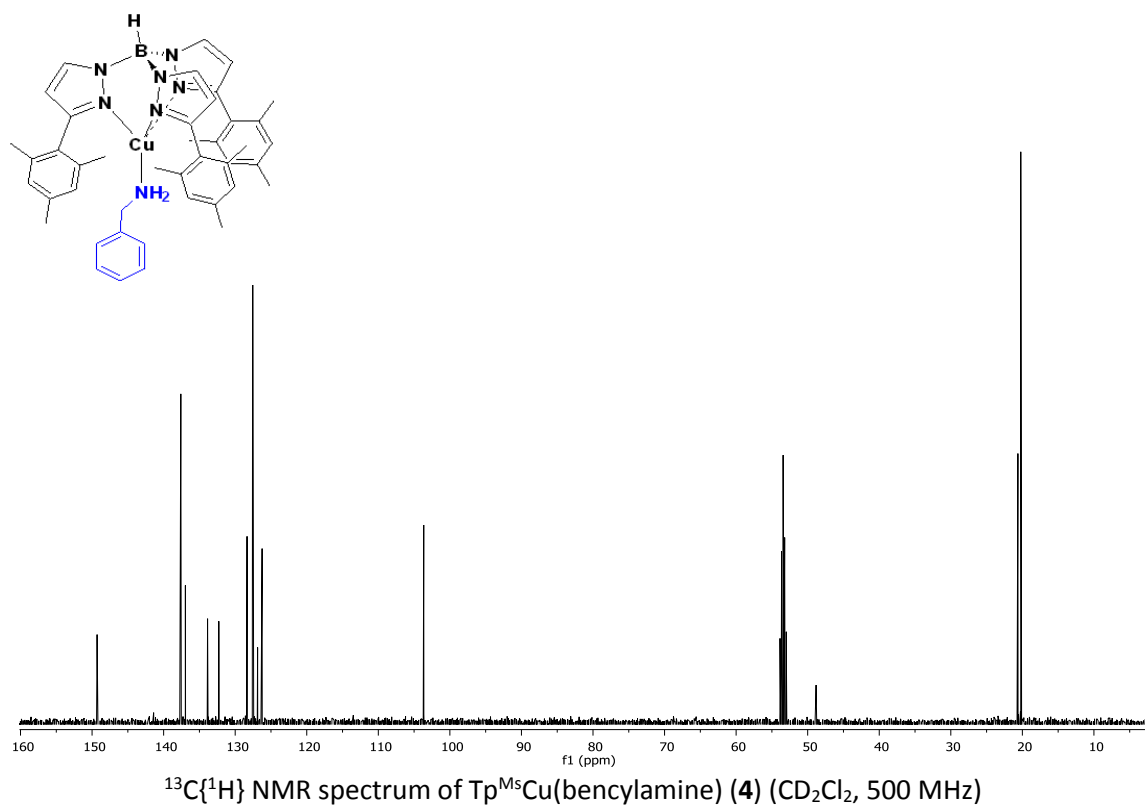



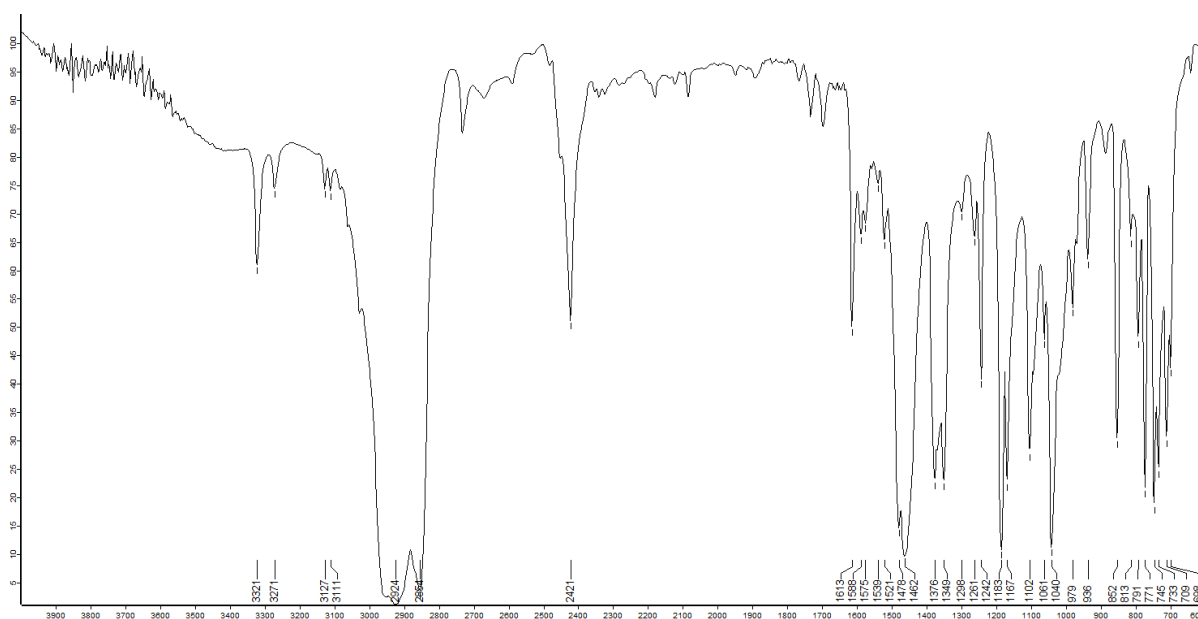

IR spectrum of  $\text{Tp}^{\text{Ms}}\text{Cu}(\text{bencylamine})$  (4)

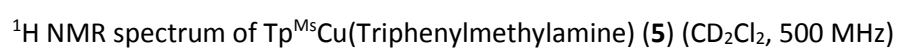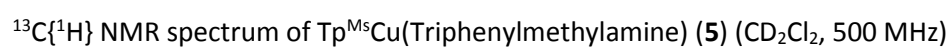

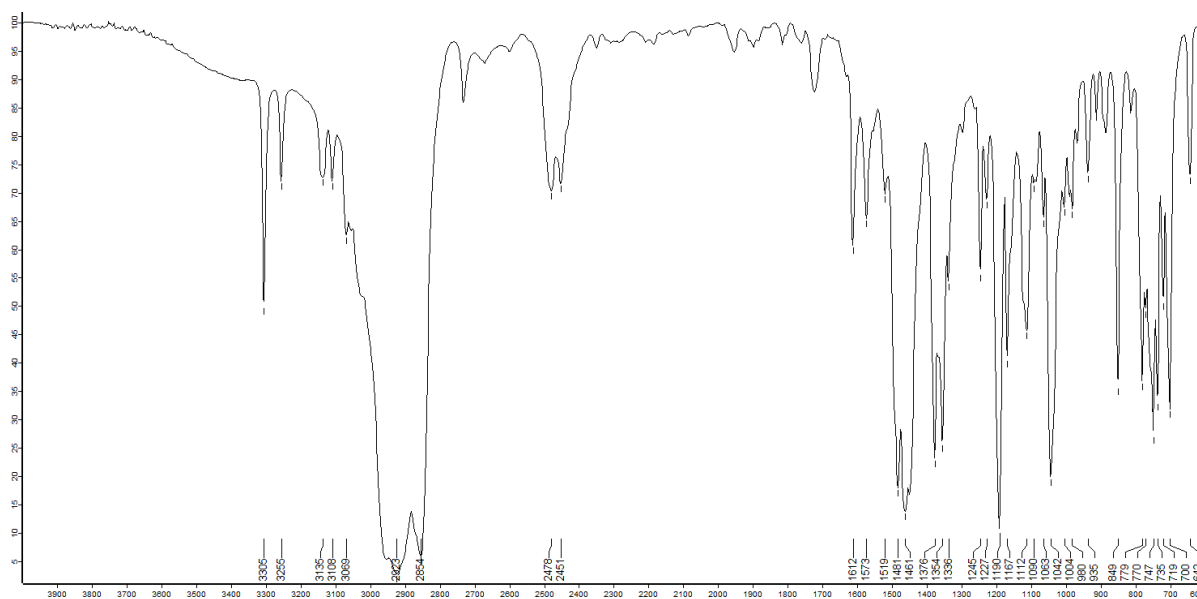

IR spectrum of  $\text{Tp}^{\text{Ms}}\text{Cu}(\text{Triphenylmethylamine})$  (5)

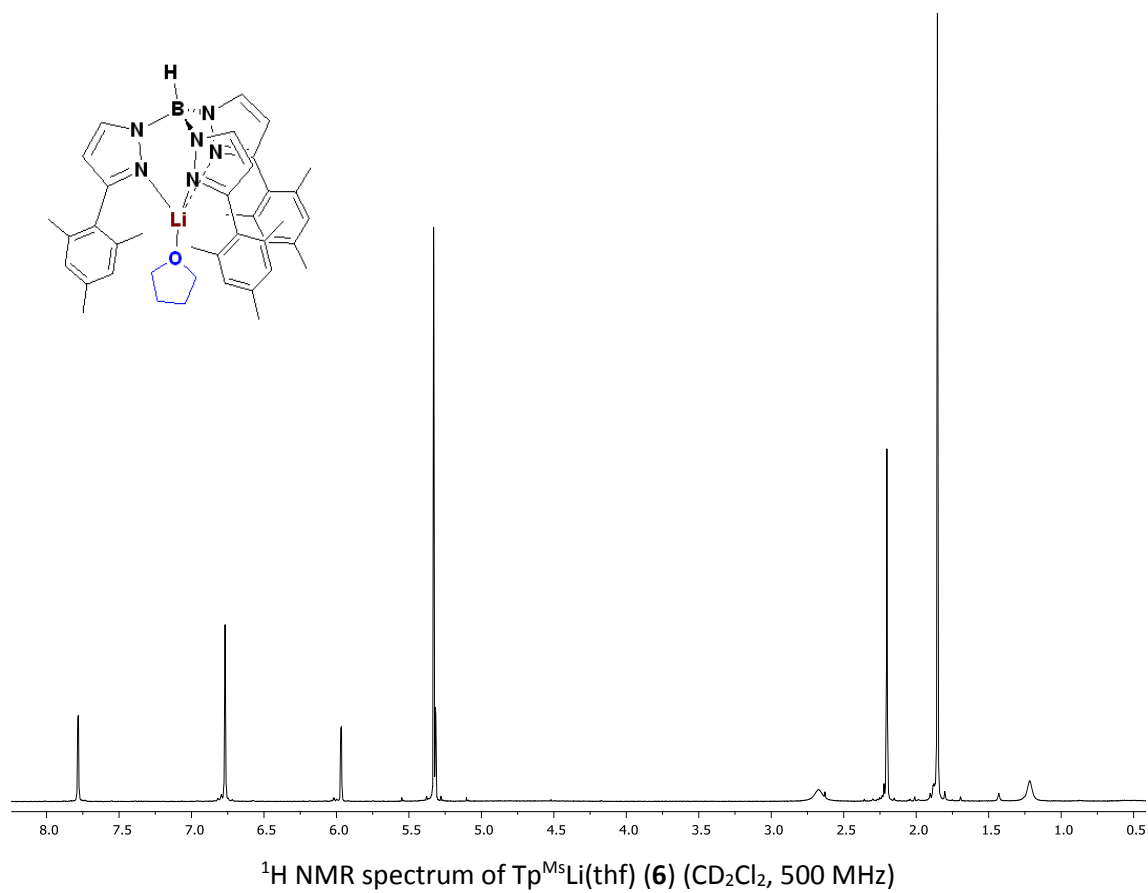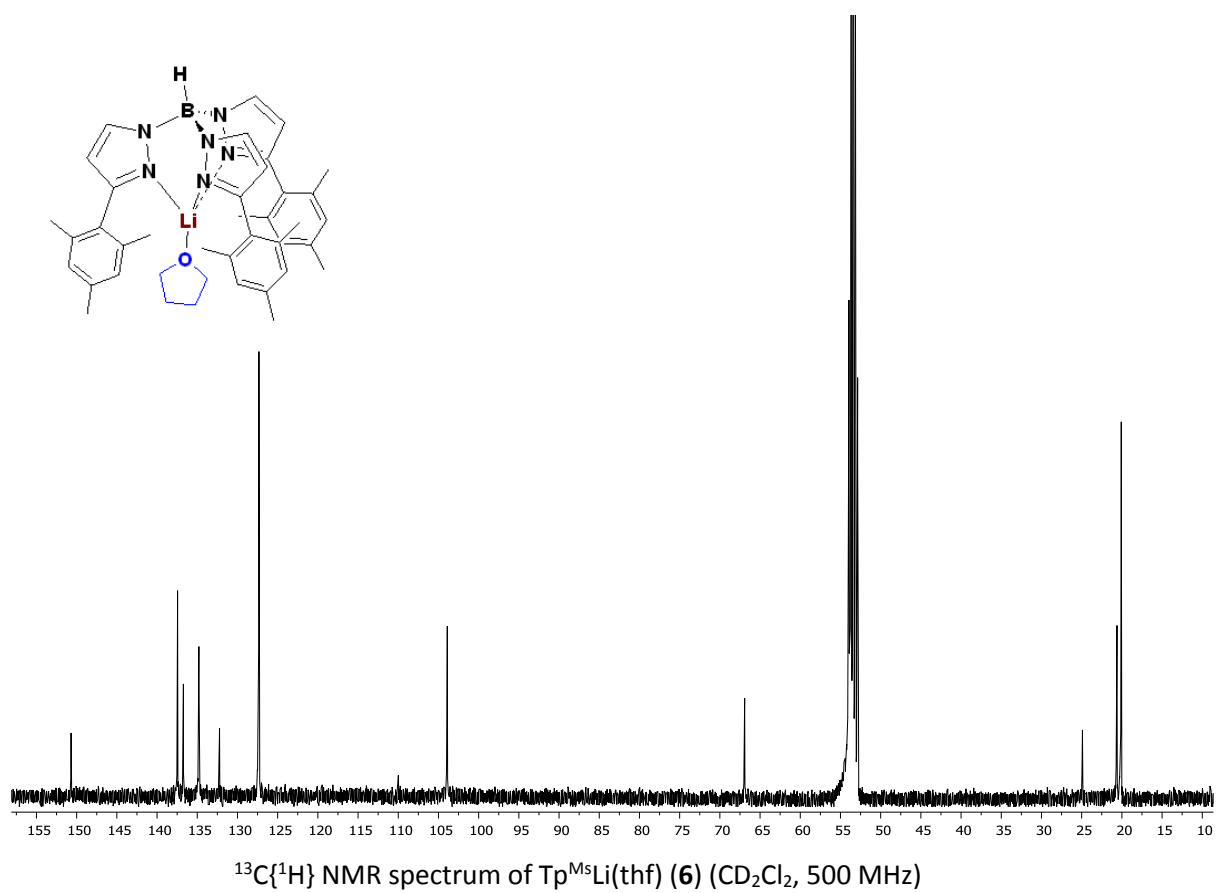

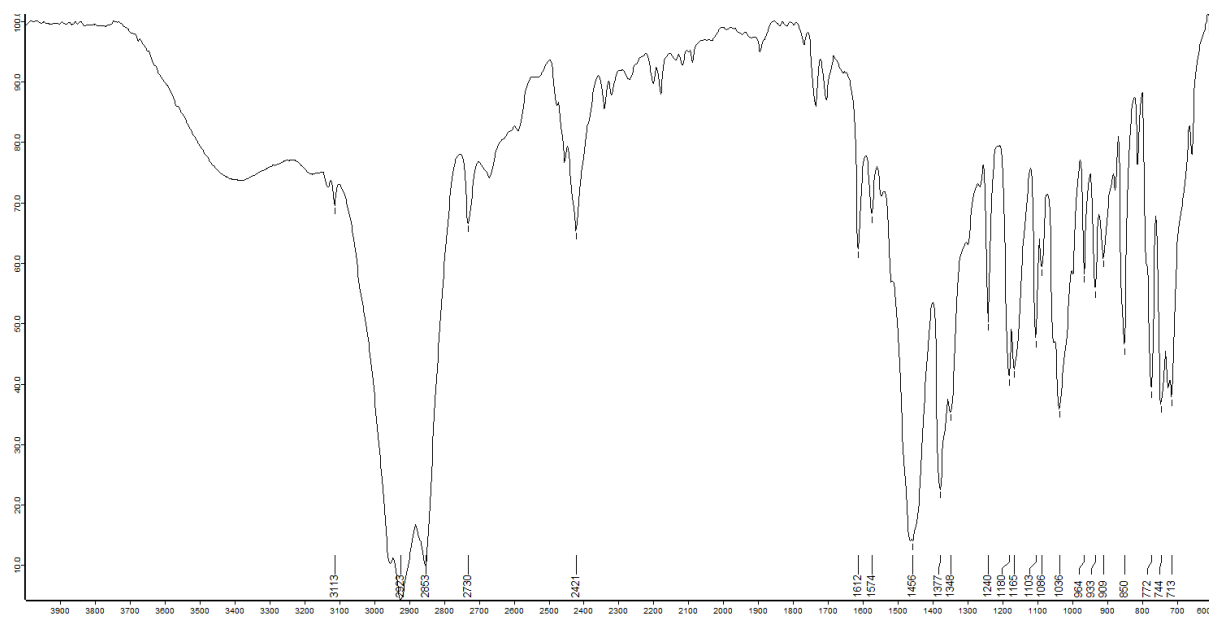

IR spectrum of  $\text{Tp}^{\text{Ms}}\text{Li}(\text{thf})$  (6)

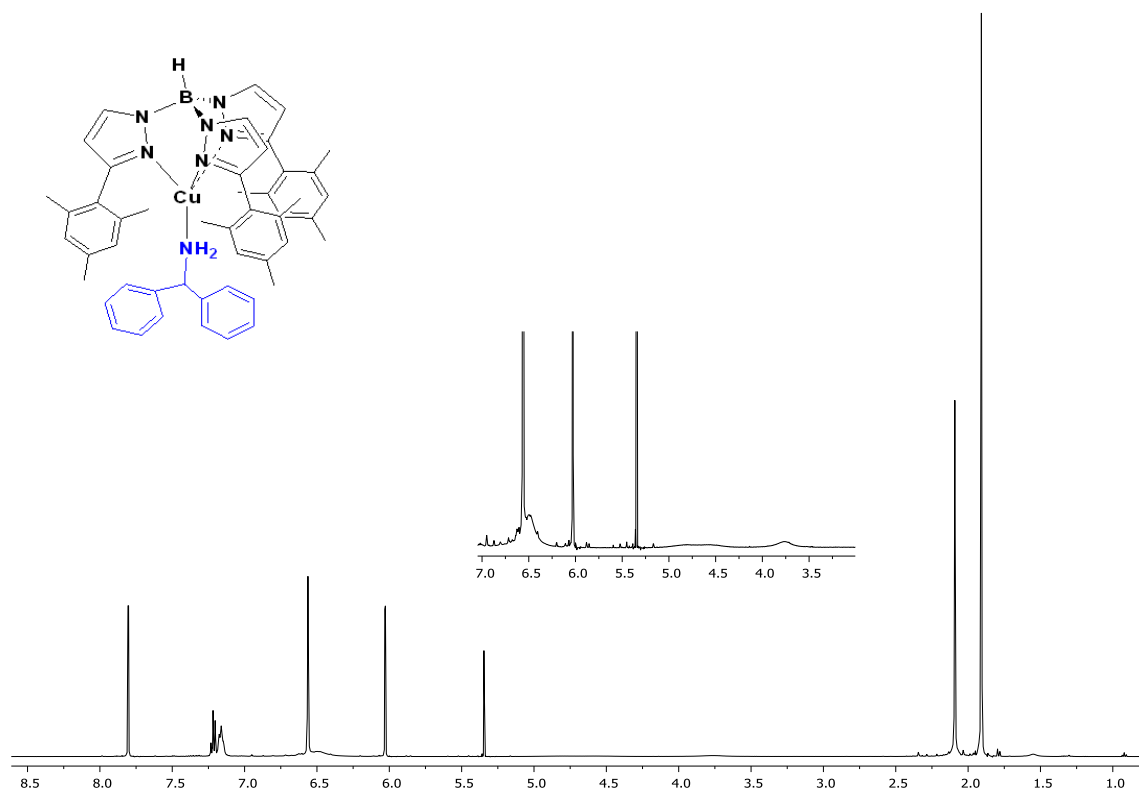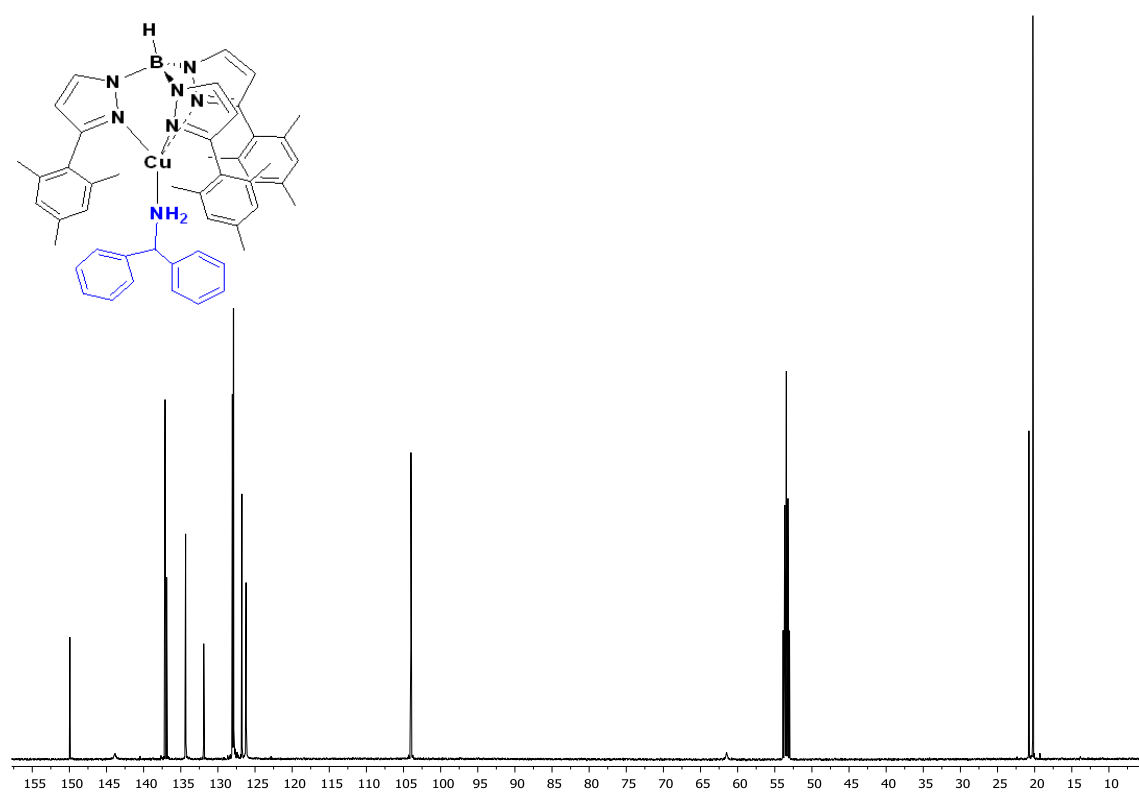

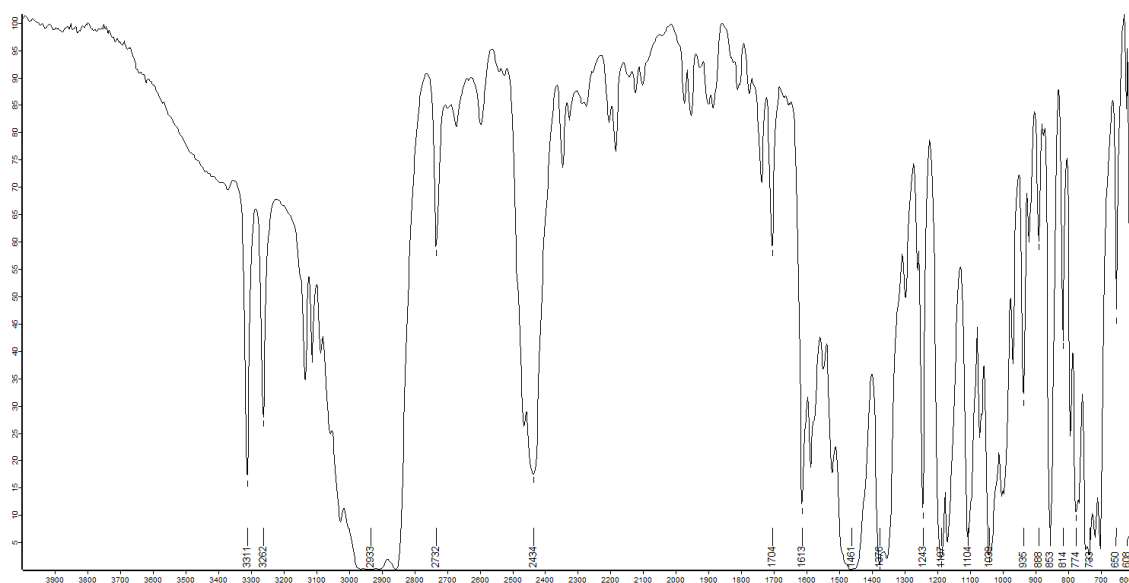

IR spectrum of  $\text{Tp}^{\text{Ms}}\text{Cu}(\text{Diphenylmethylamine})$  (7)

### Crystal X-Ray structure analysis for 1-7.

Crystals of suitable size for X-ray diffraction analysis were coated with dry perfluoropolyether and mounted on glass fibers and fixed in a cold nitrogen stream ( $T = 100\text{ K}$ ) to the goniometer head. Data collection was performed on a Bruker-Nonius X8Apex-II CCD diffractometer, using monochromatic radiation  $\lambda(\text{Mo K}\alpha) = 0.71073\text{ \AA}$ , by means of  $\omega$  and  $\phi$  scans with a width of  $0.50$  degree. The data were reduced (SAINT) [1] and corrected for absorption effects by the multi-scan method (SADABS) [2]. The structures were solved by direct methods (SIR-2002) [3] and refined against all  $F^2$  data by full-matrix least-squares techniques (SHELXTL-6.12) [4] minimizing  $w[F_o^2 - F_c^2]^2$ . All the non-hydrogen atoms were refined anisotropically, while C-H hydrogen atoms were placed in geometrically calculated positions using a riding model. The structures **3** and **4** appear with a positional disorder in the group amine and were refined in two positions with identical factors of occupation. While the structures **2**, **5** and **6** appear with a positional disorder in the group amine around a crystallographic 3-fold axis and they were refined in three positions imposed by the symmetry with identical factors of occupation of  $0.3333$ . In addition for the structure **5** also the Cu atom appears off the crystallographic 3-fold axis and it was refined jointly with the trityl amine group. Some geometric restraints (DFIX command), the ADP restraint SIMU and the rigid bond restraint DELU were used to make the geometric and ADP values of the disordered atoms more reasonable. A search for solvent accessible voids in the crystal structure **7** using PLATON [5], showed a potential solvent volume, impossible to model even with the most severe restraints. The corresponding CIF data represent SQUEEZE [6] treated structure, with the undefined solvent excluded from the structural model. The SQUEEZE result was appended to the CIF.



# **X-Ray Crystallographic data of 1.**

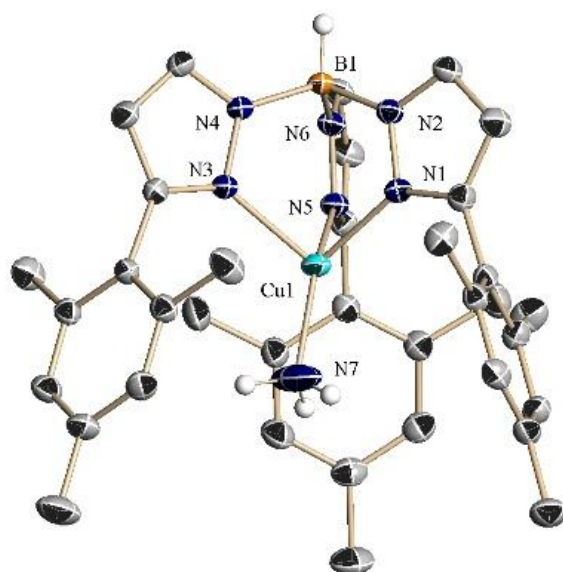

**Fig. S1:** ORTEP drawing of **1**, hydrogen atoms are omitted for clarity.

Table S1. Crystal data and structure refinement for **1**

|                                 |                                                                    |                       |
|---------------------------------|--------------------------------------------------------------------|-----------------------|
| Empirical formula               | $C_{37}H_{45}BCl_2CuN_7$                                           |                       |
| Formula weight                  | 733.05                                                             |                       |
| Temperature                     | 193(2) K                                                           |                       |
| Wavelength                      | 0.71073 Å                                                          |                       |
| Crystal system                  | Orthorhombic                                                       |                       |
| Space group                     | $Pna2_1$                                                           |                       |
| Unit cell dimensions            | $a = 16.3142(6)$ Å                                                 | $\alpha = 90^\circ$ . |
|                                 | $b = 11.7106(4)$ Å                                                 | $\beta = 90^\circ$ .  |
|                                 | $c = 19.3881(6)$ Å                                                 | $\gamma = 90^\circ$ . |
| Volume                          | $3704.1(2)$ Å <sup>3</sup>                                         |                       |
| Z                               | 4                                                                  |                       |
| Density (calculated)            | 1.315 Mg/m <sup>3</sup>                                            |                       |
| Absorption coefficient          | 0.770 mm <sup>-1</sup>                                             |                       |
| F(000)                          | 1536                                                               |                       |
| Crystal size                    | 0.50 x 0.40 x 0.30 mm <sup>3</sup>                                 |                       |
| Theta range for data collection | 2.03 to 30.51°.                                                    |                       |
| Index ranges                    | $-23 \leq h \leq 14$ , $-14 \leq k \leq 16$ , $-27 \leq l \leq 15$ |                       |
| Reflections collected           | 45530                                                              |                       |

|                                   |                                             |
|-----------------------------------|---------------------------------------------|
| Independent reflections           | 8145 [R(int) = 0.0191]                      |
| Completeness to theta = 30.51°    | 99.8 %                                      |
| Absorption correction             | Semi-empirical from equivalents             |
| Max. and min. transmission        | 0.8018 and 0.6993                           |
| Refinement method                 | Full-matrix least-squares on F <sup>2</sup> |
| Data / restraints / parameters    | 8145 / 7 / 443                              |
| Goodness-of-fit on F <sup>2</sup> | 1.044                                       |
| Final R indices [I>2sigma(I)]     | R1 = 0.0300, wR2 = 0.0765                   |
| R indices (all data)              | R1 = 0.0350, wR2 = 0.0808                   |
| Absolute structure parameter      | -0.006(8)                                   |
| Largest diff. peak and hole       | 0.534 and -0.343 e.Å <sup>-3</sup>          |

## X-Ray Crystallographic data of **2**.

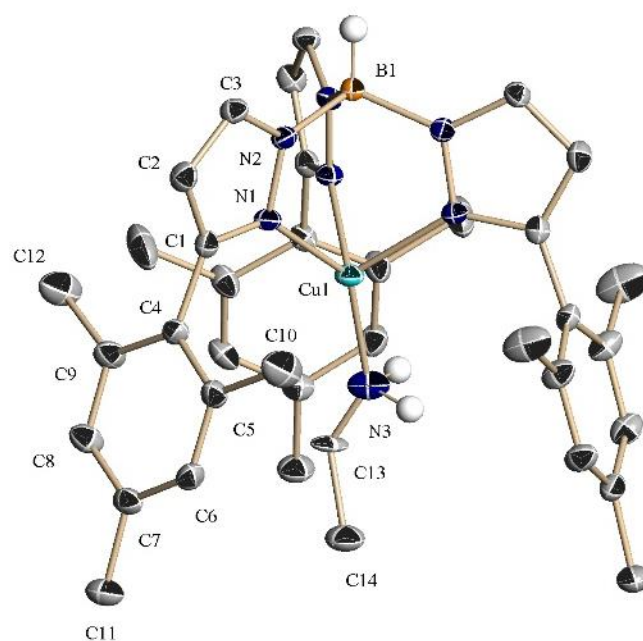

**Fig. S2:** ORTEP drawing of **2**, hydrogen atoms are omitted for clarity.

Table S2. Crystal data and structure refinement for **2**

|                        |                                           |                        |
|------------------------|-------------------------------------------|------------------------|
| Empirical formula      | $\text{C}_{38}\text{H}_{47}\text{BCuN}_7$ |                        |
| Formula weight         | 676.18                                    |                        |
| Temperature            | 193(2) K                                  |                        |
| Wavelength             | 0.71073 Å                                 |                        |
| Crystal system         | Trigonal                                  |                        |
| Space group            | R 3 c                                     |                        |
| Unit cell dimensions   | $a = 11.6413(4)$ Å                        | $\alpha = 90^\circ$ .  |
|                        | $b = 11.6413(4)$ Å                        | $\beta = 90^\circ$ .   |
|                        | $c = 45.352(3)$ Å                         | $\gamma = 120^\circ$ . |
| Volume                 | $5322.7(4)$ Å <sup>3</sup>                |                        |
| Z                      | 6                                         |                        |
| Density (calculated)   | 1.266 Mg/m <sup>3</sup>                   |                        |
| Absorption coefficient | 0.653 mm <sup>-1</sup>                    |                        |
| F(000)                 | 2147.9                                    |                        |

|                                   |                                             |
|-----------------------------------|---------------------------------------------|
| Crystal size                      | 0.50 x 0.10 x 0.10 mm <sup>3</sup>          |
| Theta range for data collection   | 2.21 to 25.22°.                             |
| Index ranges                      | -8<=h<=13, -13<=k<=11, -53<=l<=50           |
| Reflections collected             | 16469                                       |
| Independent reflections           | 2119 [R(int) = 0.0480]                      |
| Completeness to theta = 25.22°    | 99.9 %                                      |
| Absorption correction             | Semi-empirical from equivalents             |
| Max. and min. transmission        | 0.9376 and 0.9361                           |
| Refinement method                 | Full-matrix least-squares on F <sup>2</sup> |
| Data / restraints / parameters    | 2119 / 13 / 154                             |
| Goodness-of-fit on F <sup>2</sup> | 1.080                                       |
| Final R indices [I>2sigma(I)]     | R1 = 0.0373, wR2 = 0.0972                   |
| R indices (all data)              | R1 = 0.0409, wR2 = 0.1006                   |
| Absolute structure parameter      | 0.00(2)                                     |
| Largest diff. peak and hole       | 0.809 and -0.229 e.Å <sup>-3</sup>          |

### X-Ray Crystallographic data of **3**.

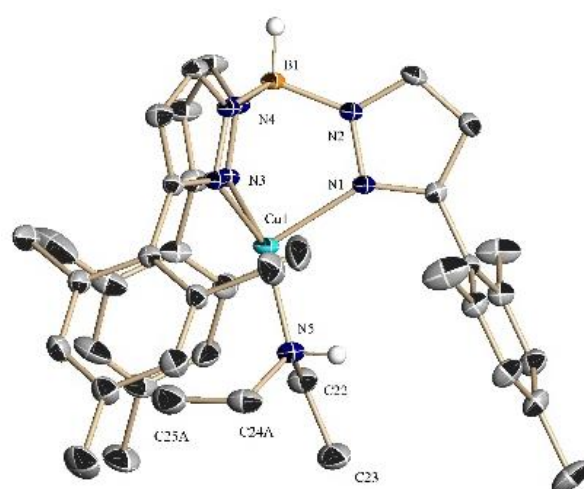

**Fig. S3:** ORTEP drawing of **3**, hydrogen atoms are omitted for clarity.

Table S3. Crystal data and structure refinement for **3**

|                                       |                                                                    |                       |
|---------------------------------------|--------------------------------------------------------------------|-----------------------|
| Empirical formula                     | $\text{C}_{40}\text{H}_{51}\text{BCuN}_7$                          |                       |
| Formula weight                        | 704.23                                                             |                       |
| Temperature                           | 193(2) K                                                           |                       |
| Wavelength                            | 0.71073 Å                                                          |                       |
| Crystal system                        | Orthorhombic                                                       |                       |
| Space group                           | $\text{C m c } 2_1$                                                |                       |
| Unit cell dimensions                  | $a = 17.1818(9)$ Å                                                 | $\alpha = 90^\circ$ . |
|                                       | $b = 13.6111(6)$ Å                                                 | $\beta = 90^\circ$ .  |
|                                       | $c = 16.4367(9)$ Å                                                 | $\gamma = 90^\circ$ . |
| Volume                                | $3843.9(3)$ Å <sup>3</sup>                                         |                       |
| Z                                     | 4                                                                  |                       |
| Density (calculated)                  | $1.217 \text{ Mg/m}^3$                                             |                       |
| Absorption coefficient                | $0.605 \text{ mm}^{-1}$                                            |                       |
| F(000)                                | 1496                                                               |                       |
| Crystal size                          | $0.25 \times 0.20 \times 0.20 \text{ mm}^3$                        |                       |
| Theta range for data collection       | $1.91$ to $25.25^\circ$ .                                          |                       |
| Index ranges                          | $-19 \leq h \leq 20$ , $-16 \leq k \leq 16$ , $-17 \leq l \leq 19$ |                       |
| Reflections collected                 | 17014                                                              |                       |
| Independent reflections               | 3354 [ $R(\text{int}) = 0.0268$ ]                                  |                       |
| Completeness to theta = $25.25^\circ$ | 100.0 %                                                            |                       |
| Absorption correction                 | Semi-empirical from equivalents                                    |                       |

|                                      |                                    |
|--------------------------------------|------------------------------------|
| Max. and min. transmission           | 0.8885 and 0.8634                  |
| Refinement method                    | Full-matrix least-squares on $F^2$ |
| Data / restraints / parameters       | 3354 / 77 / 266                    |
| Goodness-of-fit on $F^2$             | 1.030                              |
| Final R indices [ $I > 2\sigma(I)$ ] | R1 = 0.0312, wR2 = 0.0791          |
| R indices (all data)                 | R1 = 0.0340, wR2 = 0.0810          |
| Absolute structure parameter         | -0.003(14)                         |
| Largest diff. peak and hole          | 0.265 and -0.241 e.Å <sup>-3</sup> |

## X-Ray Crystallographic data of **4**

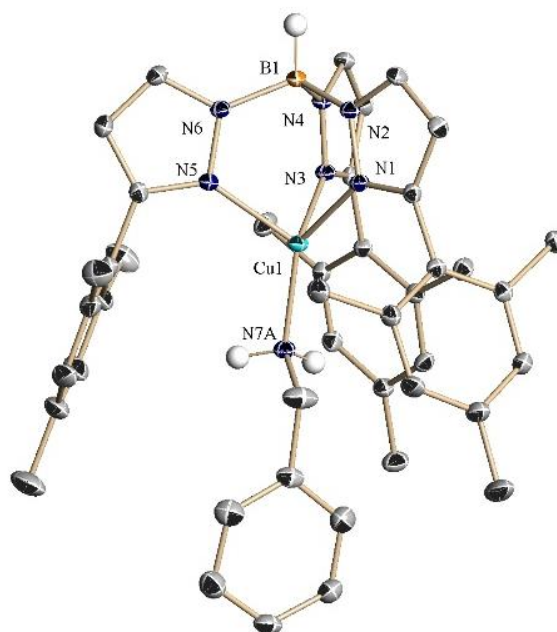

**Fig. S4:** ORTEP drawing of **4**, hydrogen atoms are omitted for clarity.

Table S4. Crystal data and structure refinement for **4**

|                                 |                                                                    |                               |
|---------------------------------|--------------------------------------------------------------------|-------------------------------|
| Empirical formula               | $\text{C}_{43}\text{H}_{49}\text{BCuN}_7$                          |                               |
| Formula weight                  | 738.24                                                             |                               |
| Temperature                     | 193(2) K                                                           |                               |
| Wavelength                      | 0.71073 Å                                                          |                               |
| Crystal system                  | Monoclinic                                                         |                               |
| Space group                     | $P 2_1/c$                                                          |                               |
| Unit cell dimensions            | $a = 19.5923(5)$ Å                                                 | $\alpha = 90^\circ$ .         |
|                                 | $b = 11.7255(3)$ Å                                                 | $\beta = 90.8290(10)^\circ$ . |
|                                 | $c = 16.7466(4)$ Å                                                 | $\gamma = 90^\circ$ .         |
| Volume                          | $3846.79(17)$ Å <sup>3</sup>                                       |                               |
| Z                               | 4                                                                  |                               |
| Density (calculated)            | $1.275 \text{ Mg/m}^3$                                             |                               |
| Absorption coefficient          | $0.608 \text{ mm}^{-1}$                                            |                               |
| F(000)                          | 1560                                                               |                               |
| Crystal size                    | $0.50 \times 0.10 \times 0.10 \text{ mm}^3$                        |                               |
| Theta range for data collection | $2.12$ to $25.25^\circ$ .                                          |                               |
| Index ranges                    | $-23 \leq h \leq 23$ , $-14 \leq k \leq 14$ , $-20 \leq l \leq 20$ |                               |
| Reflections collected           | 75457                                                              |                               |

|                                   |                                             |
|-----------------------------------|---------------------------------------------|
| Independent reflections           | 6963 [R(int) = 0.0323]                      |
| Completeness to theta = 25.25°    | 100.0 %                                     |
| Absorption correction             | Semi-empirical from equivalents             |
| Max. and min. transmission        | 0.9417 and 0.8508                           |
| Refinement method                 | Full-matrix least-squares on F <sup>2</sup> |
| Data / restraints / parameters    | 6963 / 396 / 550                            |
| Goodness-of-fit on F <sup>2</sup> | 1.075                                       |
| Final R indices [I>2sigma(I)]     | R1 = 0.0307, wR2 = 0.0840                   |
| R indices (all data)              | R1 = 0.0396, wR2 = 0.0886                   |
| Largest diff. peak and hole       | 0.268 and -0.409 e.Å <sup>-3</sup>          |



# X-Ray Crystallographic data of 5.

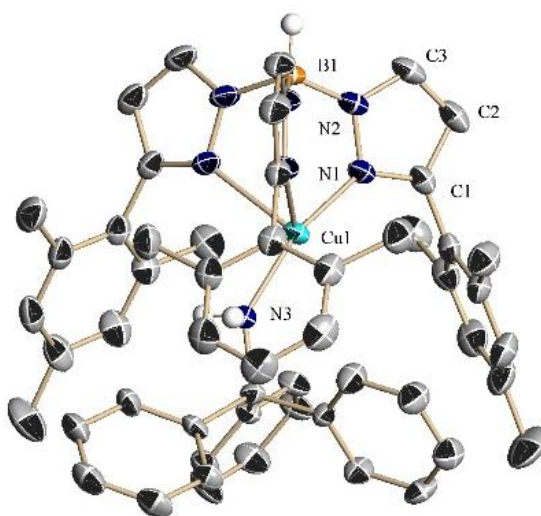

**Fig. S5:** ORTEP drawing of **5**, hydrogen atoms are omitted for clarity.

Table S5. Crystal data and structure refinement for **5**

|                                 |                                                                                                                                                                |           |
|---------------------------------|----------------------------------------------------------------------------------------------------------------------------------------------------------------|-----------|
| Empirical formula               | C <sub>58</sub> H <sub>63</sub> BCl <sub>6</sub> CuN <sub>7</sub><br>[C <sub>55</sub> H <sub>57</sub> BCuN <sub>7</sub> , 3(CH <sub>2</sub> Cl <sub>2</sub> )] |           |
| Formula weight                  | 1145.20                                                                                                                                                        |           |
| Temperature                     | 193(2) K                                                                                                                                                       |           |
| Wavelength                      | 0.71073 Å                                                                                                                                                      |           |
| Crystal system                  | Trigonal                                                                                                                                                       |           |
| Space group                     | R -3                                                                                                                                                           |           |
| Unit cell dimensions            | a = 20.1415(4) Å                                                                                                                                               | α = 90°.  |
|                                 | b = 20.1415(4) Å                                                                                                                                               | β = 90°.  |
|                                 | c = 24.6108(12) Å                                                                                                                                              | γ = 120°. |
| Volume                          | 8646.5(5) Å <sup>3</sup>                                                                                                                                       |           |
| Z                               | 6                                                                                                                                                              |           |
| Density (calculated)            | 1.320 Mg/m <sup>3</sup>                                                                                                                                        |           |
| Absorption coefficient          | 0.701 mm <sup>-1</sup>                                                                                                                                         |           |
| F(000)                          | 3576                                                                                                                                                           |           |
| Crystal size                    | 0.50 x 0.40 x 0.25 mm <sup>3</sup>                                                                                                                             |           |
| Theta range for data collection | 1.43 to 25.24°.                                                                                                                                                |           |
| Index ranges                    | -24 ≤ h ≤ 24, -24 ≤ k ≤ 24, -29 ≤ l ≤ 29                                                                                                                       |           |
| Reflections collected           | 74684                                                                                                                                                          |           |

|                                   |                                             |
|-----------------------------------|---------------------------------------------|
| Independent reflections           | 3478 [R(int) = 0.0316]                      |
| Completeness to theta = 25.24°    | 100.0 %                                     |
| Absorption correction             | Semi-empirical from equivalents             |
| Max. and min. transmission        | 0.8443 and 0.7208                           |
| Refinement method                 | Full-matrix least-squares on F <sup>2</sup> |
| Data / restraints / parameters    | 3478 / 337 / 328                            |
| Goodness-of-fit on F <sup>2</sup> | 1.066                                       |
| Final R indices [I>2sigma(I)]     | R1 = 0.0389, wR2 = 0.1131                   |
| R indices (all data)              | R1 = 0.0507, wR2 = 0.1218                   |
| Largest diff. peak and hole       | 0.255 and -0.193 e.Å <sup>-3</sup>          |

# X-Ray Crystallographic data of 6.

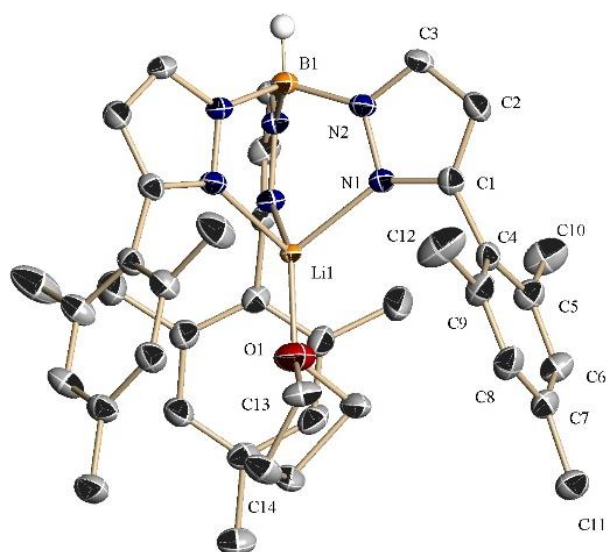

**Fig. S6:** ORTEP drawing of **6**, hydrogen atoms are omitted for clarity.

Table S6. Crystal data and structure refinement for **6**

|                                 |                                          |                        |
|---------------------------------|------------------------------------------|------------------------|
| Empirical formula               | $C_{40}H_{48}BLiN_6O$                    |                        |
| Formula weight                  | 646.59                                   |                        |
| Temperature                     | 193(2) K                                 |                        |
| Wavelength                      | 0.71073 Å                                |                        |
| Crystal system                  | Trigonal                                 |                        |
| Space group                     | R 3 c                                    |                        |
| Unit cell dimensions            | $a = 11.90130(10)$ Å                     | $\alpha = 90^\circ$ .  |
|                                 | $b = 11.90130(10)$ Å                     | $\beta = 90^\circ$ .   |
|                                 | $c = 45.2468(10)$ Å                      | $\gamma = 120^\circ$ . |
| Volume                          | $5550.18(14)$ Å <sup>3</sup>             |                        |
| Z                               | 6                                        |                        |
| Density (calculated)            | 1.161 Mg/m <sup>3</sup>                  |                        |
| Absorption coefficient          | 0.070 mm <sup>-1</sup>                   |                        |
| F(000)                          | 2076                                     |                        |
| Crystal size                    | 0.50 x 0.50 x 0.45 mm <sup>3</sup>       |                        |
| Theta range for data collection | 2.67 to 25.23°.                          |                        |
| Index ranges                    | -14 ≤ h ≤ 14, -14 ≤ k ≤ 14, -54 ≤ l ≤ 54 |                        |
| Reflections collected           | 37671                                    |                        |
| Independent reflections         | 1124 [R(int) = 0.0258]                   |                        |

|                                   |                                             |
|-----------------------------------|---------------------------------------------|
| Completeness to theta = 25.23°    | 99.8 %                                      |
| Absorption correction             | Semi-empirical from equivalents             |
| Max. and min. transmission        | 0.9703 and 0.9671                           |
| Refinement method                 | Full-matrix least-squares on F <sup>2</sup> |
| Data / restraints / parameters    | 1124 / 51 / 158                             |
| Goodness-of-fit on F <sup>2</sup> | 1.393                                       |
| Final R indices [I>2sigma(I)]     | R1 = 0.0660, wR2 = 0.1856                   |
| R indices (all data)              | R1 = 0.0667, wR2 = 0.1864                   |
| Largest diff. peak and hole       | 0.570 and -0.575 e.Å <sup>-3</sup>          |

## X-Ray Crystallographic data of **7**.

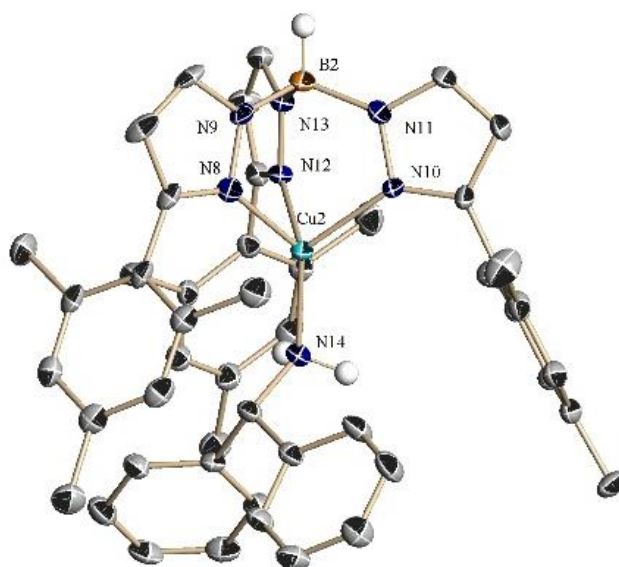

**Fig. S7:** ORTEP drawing of **7**, hydrogen atoms are omitted for clarity.

Table S7. Crystal data and structure refinement for **7**

|                                 |                                                                                                                                                             |                 |
|---------------------------------|-------------------------------------------------------------------------------------------------------------------------------------------------------------|-----------------|
| Empirical formula               | C <sub>50</sub> H <sub>55</sub> BCl <sub>2</sub> CuN <sub>7</sub><br>[C <sub>49</sub> H <sub>53</sub> BCuN <sub>7</sub> , CH <sub>2</sub> Cl <sub>2</sub> ] |                 |
| Formula weight                  | 899.26                                                                                                                                                      |                 |
| Temperature                     | 193(2) K                                                                                                                                                    |                 |
| Wavelength                      | 0.71073 Å                                                                                                                                                   |                 |
| Crystal system                  | Monoclinic                                                                                                                                                  |                 |
| Space group                     | P 2 <sub>1</sub> /n                                                                                                                                         |                 |
| Unit cell dimensions            | a = 18.5242(10) Å                                                                                                                                           | α = 90°.        |
|                                 | b = 14.3774(9) Å                                                                                                                                            | β = 97.093(3)°. |
|                                 | c = 36.400(2) Å                                                                                                                                             | γ = 90°.        |
| Volume                          | 9620.3(10) Å <sup>3</sup>                                                                                                                                   |                 |
| Z                               | 8                                                                                                                                                           |                 |
| Density (calculated)            | 1.242 Mg/m <sup>3</sup>                                                                                                                                     |                 |
| Absorption coefficient          | 0.606 mm <sup>-1</sup>                                                                                                                                      |                 |
| F(000)                          | 3776                                                                                                                                                        |                 |
| Crystal size                    | 0.20 x 0.10 x 0.05 mm <sup>3</sup>                                                                                                                          |                 |
| Theta range for data collection | 1.13 to 25.25°.                                                                                                                                             |                 |
| Index ranges                    | -22 ≤ h ≤ 22, -17 ≤ k ≤ 17, -43 ≤ l ≤ 43                                                                                                                    |                 |
| Reflections collected           | 199250                                                                                                                                                      |                 |

|                                   |                                                   |
|-----------------------------------|---------------------------------------------------|
| Independent reflections           | 17359 [R(int) = 0.0947]                           |
| Completeness to theta = 25.25°    | 99.7 %                                            |
| Absorption correction             | Semi-empirical from equivalents                   |
| Max. and min. transmission        | 0.9703 and 0.8884                                 |
| Refinement method                 | Full-matrix-block least-squares on F <sup>2</sup> |
| Data / restraints / parameters    | 17359 / 28 / 1117                                 |
| Goodness-of-fit on F <sup>2</sup> | 1.073                                             |
| Final R indices [I>2sigma(I)]     | R1 = 0.10, wR2 = 0.27                             |
| R indices (all data)              | R1 = 0.13, wR2 = 0.25                             |
| Largest diff. peak and hole       | 1.173 and -1.067 e.Å <sup>-3</sup>                |

## References

- [1] Bruker (**2007**). *APEX2*. Bruker AXS Inc., Madison, Wisconsin, USA.
- [2] Bruker (**2001**). *APEX2*. Bruker AXS Inc., Madison, Wisconsin, USA.
- [3] C. M. Burla, M. Camalli, B. Carrozzini, G. L. Cascarano, C. Giacovazzo, G. Poliori, R. Spagna, *SIR2002*: the program; (**2003**). *J. Appl. Cryst.* **36**, 1103–1103.
- [4] G. M. Sheldrick, *Acta Crystallogr., Sect. A: Found. Crystallogr.*, **2008**, 64, 112-122.
- [5] A. L. Spek, *J. Appl. Crystallogr.*, **2003**, 36, 7-13.
- [6] P. v.d. Sluis and A. L. Spek, *Acta Crystallogr., Sect. A: Found. Crystallogr.*, 1990, 46, 194-201.
